# Supplementary material for: In situ sulfuration synthesis of heterostructure MoS2–Mo2C@C for boosting the photocatalytic H2 production activity of TiO2
Source: Royal Society of Chemistry journal article supplement (doi:10.1039/d1tc05576c), 2022-01-01
Supplement: d1tc05576c1.pdf [file d1tc05576c1.pdf]

## Supporting Information

### ***In situ* sulfuration synthesis of heterostructure MoS<sub>2</sub>-Mo<sub>2</sub>C@C for boosting photocatalytic H<sub>2</sub>-production activity of TiO<sub>2</sub>**

Jinfeng Liu<sup>a</sup>, Ping Wang<sup>\*a</sup>, Lulu Gao<sup>a</sup>, Xuefei Wang<sup>a</sup>, Huogen Yu<sup>\*ab</sup>

<sup>a</sup> School of Chemistry, Chemical Engineering and Life Sciences and School of Materials Science and Engineering, Wuhan University of Technology, Wuhan, 430070, P. R. China

<sup>b</sup> Laboratory of Solar Fuel, Faculty of Materials Science and Chemistry, China University of Geosciences, Wuhan, 430074, P. R. China

\*Corresponding authors. Tel: +86(27)87749379;

E-mail: wangping0904@whut.edu.cn (Ping Wang);

huogenyu@163.com (Huogen Yu)

## SI Experimental

### SI-1 Materials

Titanium dioxide (TiO<sub>2</sub>-P25), sulfur powder (S), ammonium heptamolybdate ((NH<sub>4</sub>)<sub>6</sub>Mo<sub>7</sub>O<sub>24</sub>·4H<sub>2</sub>O, AR), cadmium nitrate (Cd(NO<sub>3</sub>)<sub>2</sub>·4H<sub>2</sub>O), Zinc nitrate (Zn(NO<sub>3</sub>)<sub>2</sub>·6H<sub>2</sub>O), sodium sulfide (Na<sub>2</sub>S·9H<sub>2</sub>O), sodium sulfate (Na<sub>2</sub>SO<sub>4</sub>), methanol (CH<sub>3</sub>OH), and ethyl alcohol (C<sub>2</sub>H<sub>5</sub>OH) were of analytical grade from Shanghai Chemical Reagent Ltd. (PR China) and used without further purification.

**SI-2** Based on the XRD patterns, the weight ratio of MoS<sub>2</sub> and Mo<sub>2</sub>C in the MoS<sub>2</sub>-Mo<sub>2</sub>C@C samples can be estimated using the following formula S1 [Ref. S1]:

$$W_A = \frac{I_A}{I_A + (I_B/(RIR_B/RIR_A))}$$
$$W_B = \frac{I_B}{I_B + (I_A/(RIR_A/RIR_B))} \quad S1$$

where  $I_A$  and  $I_B$  are the intensities of the strongest lines of the X-ray diffraction patterns of MoS<sub>2</sub> and Mo<sub>2</sub>C, respectively. The  $RIR$  values of MoS<sub>2</sub> (JCPDS Card No. 37-1492) and Mo<sub>2</sub>C (JCPDS Card No. 35-0787) were obtained by the matrix-flushing method according to the Chung's report [Ref. S2].

### SI-3 Characterization

X-ray diffraction (XRD) (D/MAXRB, RIGAKU, Japan), FTIR (Nicolet 6700, Thermo Electron Scientific Instruments, USA), Raman microscope (InVia, Renishaw, UK), and transmission electron microscopy (TEM) (Talos F200S, Thermo Fisher, USA) with an energy-dispersive X-ray spectroscopy (EDS) were used to

character the microstructures and morphologies of the photocatalysts. Nitrogen adsorption-desorption isotherms were analyzed by a nitrogen adsorption-desorption apparatus (ASAP 2020, Micromeritics, USA). Elemental analyses were characterized X-ray photoelectron spectroscopy (XPS) (ESCALAB 250Xi, Thermo Scientific, USA). UV-vis spectrophotometer (UV-2450, Shimadzu, Japan) was used to perform the optical absorption property. Time-resolved photoluminescence (TRPL) (FLS920, Edinburgh Instruments, UK) was applied to measure the fluorescence lifetimes.

#### **SI-4 Photoelectrochemical measurements**

Photoelectrochemical curves were measured on an electrochemical analyzer (CHI660E, China) in a standard three-electrode configuration. The prepared samples were loaded on fluorine-doped tin oxide (FTO) conductor glass, a standard Ag/AgCl electrode and a platinum foil as the working electrodes, reference electrode and counter electrode, respectively, with Na<sub>2</sub>SO<sub>4</sub> (0.5 M) as electrolyte solution. The working electrodes were prepared on fluorine-doped tin oxide (FTO) conductor glass in a typically method. First, photocatalysts (4 mg) were dispersed in a solution which mixed with 1 mL of anhydrous ethanol and 100  $\mu$ L of D-520 Nafion solution (5%, w/w, in water and 1-propanol, Alfa Aesar), and then ultrasonicated for 30 min to achieve the suspension solution. The suspension was spread on the FTO glass which dried at 60°C for one night. Linear sweep voltammetry (LSV) curves were obtained in the potential ranging of -0.4 to -1.5 V with a scan rate of 10 mV s<sup>-1</sup>. Transient photocurrent responses (*i-t*) curves were conducted at a static potential of +0.5 V.

Electrochemical impedance spectroscopy (EIS) was performed at a frequency range of  $10^{-2}$ - $10^4$  Hz. The Mott-Schottky plots were measured at a fixed frequency of 3000 Hz to determine the flat band potential. A 3W LED lamp (365 nm) was served as the irradiator.

### SI-5 Measurement of photocatalytic hydrogen evolution

Photocatalytic hydrogen production activity was evaluated with 50 mg of photocatalyst dispersed in a 100 mL three-necked Pyrex glass containing 80 mL of methyl alcohol (10 vol%) under four LEDs (3 W, 365 nm, Shenzhen Lamplic Science Co. Ltd., China). The system was bubbled with  $N_2$  for 15 min to guarantee hydrogen production process occurring in an inert atmosphere. After four 365 nm-LED lights irradiated the system, 400  $\mu$ L of gas was injected into a gas chromatograph (Shimadzu, GC-2014C, Japan) with a thermal conductivity detector and a 5 Å molecular sieve column with nitrogen as a carrier gas. The apparent quantum efficiency (AQE) was calculated according to the equation S2:

$$AQE(\%) = \frac{\text{number of reacted electrons}}{\text{number of incident photons}} \times 100\%$$

$$= \frac{\text{number of evolved } H_2 \text{ molecules} \times 2}{\text{number of incident photons}} \times 100\% \quad S2$$

### SI-6 Fluorescent lifetime of the samples

The lifetime of photogenerated charge carries of samples are fitted by a biexponential function as the equation S3 [Ref 3]:

$$I(t) = A_1 \exp(-t/\tau_1) + A_2 \exp(-t/\tau_2) \quad S3$$

where  $\tau_1$  and  $\tau_2$  are the lifetime of photogenerated charge carries, and  $A_1$ , and  $A_2$  are

the corresponding amplitudes. The short lifetime component for  $\tau_1$  represents the radiation-recombination time of photogenerated carriers, while the longer lifetime component for  $\tau_2$  originates from the nonradioactive recombination of the relaxation effect for photogenerated charges and the  $\tau_{av}$  represents the average excited-state lifetime.

## References

- [1] Y. Lu, J. Zhang, F. Wang, X. Chen, Z. Feng, and C. Li, K<sub>2</sub>SO<sub>4</sub>-assisted hexagonal/monoclinic WO<sub>3</sub> phase junction for efficient photocatalytic degradation of RhB. *ACS Applied Energy Materials*, 1 (2018) 2067-2077.
- [2] H. Frank, Quantitative interpretation of X-ray diffraction patterns of mixtures. I. matrix-flushing method for quantitative multicomponent analysis. *Journal of Applied Crystal* 7 (1974) 519-525.
- [3] X. Wang, C. Liow, A. Bisht, X. Liu, T. Sum, X. Chen, S. Li, Engineering interfacial photo-induced charge transfer based on nanobamboo array architecture for efficient solar-to-chemical energy conversion, *Advanced Materials*, 27 (2015) 2207-2214.

## Figure captions

**Fig. S1** Nitrogen adsorption-desorption isotherms of (a) TiO<sub>2</sub>, (b) Mo<sub>2</sub>C@C/TiO<sub>2</sub>, (c) MoS<sub>2</sub>-Mo<sub>2</sub>C@C/TiO<sub>2</sub>, and (d) MoS<sub>2</sub>@C/TiO<sub>2</sub>.

**Fig. S2** The photocatalytic H<sub>2</sub>-evolution performance of MoS<sub>2</sub>-Mo<sub>2</sub>C@C/TiO<sub>2</sub> photocatalyst under different pH value (A) and methanol concentration (B).

**Fig. S3** (A) XRD patterns and (B) XPS spectra of Mo 3d for the MoS<sub>2</sub>-Mo<sub>2</sub>C@C/TiO<sub>2</sub> sample: (a) before and (b) after the cyclic photocatalytic hydrogen-production reaction.

**Fig. S4** Linear sweep voltammetry curves of (a) Mo<sub>2</sub>C@C, (b) MoS<sub>2</sub>-Mo<sub>2</sub>C@C, and (c) MoS<sub>2</sub>@C.

**Fig. S5** Mott-Schottky plots of (a) TiO<sub>2</sub> and (b) MoS<sub>2</sub>-Mo<sub>2</sub>C@C/TiO<sub>2</sub> photocatalyst in

**Fig. S5** Mott-Schottky plots of (a) TiO<sub>2</sub> and (b) MoS<sub>2</sub>-Mo<sub>2</sub>C@C/TiO<sub>2</sub> photocatalyst in Na<sub>2</sub>SO<sub>4</sub> solution (0.1 mol L<sup>-1</sup>).

**Fig. S6** (A, B) XRD patterns and (C, D) UV-vis spectra of (a) CdS, (a') MoS<sub>2</sub>-Mo<sub>2</sub>C@C/CdS, (b) ZnS, and (b') MoS<sub>2</sub>-Mo<sub>2</sub>C@C/ZnS.

**Table S1** The specific surface area and pore volume of various photocatalysts.

| Samples                                                | Specific surface area<br>(m <sup>2</sup> g <sup>-1</sup> ) | Pore volume<br>(cm <sup>3</sup> g <sup>-1</sup> ) |
|--------------------------------------------------------|------------------------------------------------------------|---------------------------------------------------|
| TiO <sub>2</sub>                                       | 54.41                                                      | 0.52                                              |
| Mo <sub>2</sub> C@C/TiO <sub>2</sub>                   | 45.58                                                      | 0.60                                              |
| MoS <sub>2</sub> -Mo <sub>2</sub> C@C/TiO <sub>2</sub> | 44.05                                                      | 0.63                                              |
| MoS <sub>2</sub> @C/TiO <sub>2</sub>                   | 42.11                                                      | 0.57                                              |

**Table S2** The H<sub>2</sub>-evolution performance and apparent quantum efficiency (AQE) of the various samples.

| Samples                                                                                                                  | H <sub>2</sub> -evolution rate<br>( $\mu\text{mol h}^{-1} \text{g}^{-1}$ ) | AQE<br>(%) |
|--------------------------------------------------------------------------------------------------------------------------|----------------------------------------------------------------------------|------------|
| TiO <sub>2</sub>                                                                                                         | 10                                                                         | 0.03       |
| MoS <sub>2</sub> -Mo <sub>2</sub> C@C-500/TiO <sub>2</sub>                                                               | 860                                                                        | 2.58       |
| MoS <sub>2</sub> -Mo <sub>2</sub> C@C-600/TiO <sub>2</sub>                                                               | 940                                                                        | 2.82       |
| MoS <sub>2</sub> -Mo <sub>2</sub> C@C-700/TiO <sub>2</sub> (MoS <sub>2</sub> -<br>Mo <sub>2</sub> C@C/TiO <sub>2</sub> ) | 1160                                                                       | 3.48       |
| MoS <sub>2</sub> -Mo <sub>2</sub> C@C-800/TiO <sub>2</sub>                                                               | 800                                                                        | 2.4        |
| Mo <sub>2</sub> C@C/TiO <sub>2</sub>                                                                                     | 610                                                                        | 1.83       |
| MoS <sub>2</sub> @C/TiO <sub>2</sub>                                                                                     | 300                                                                        | 0.9        |



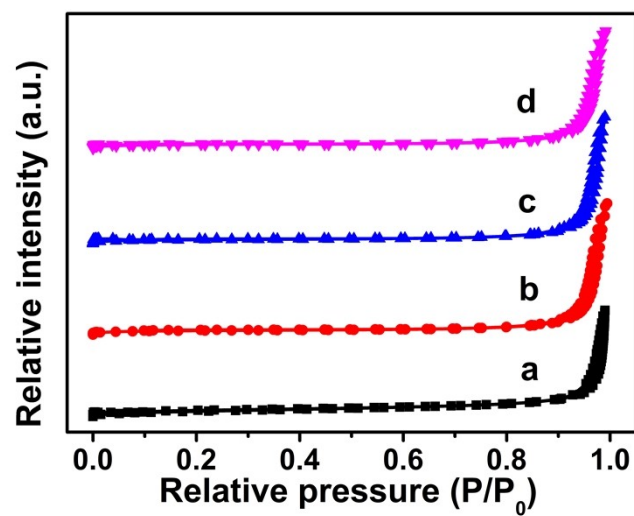

**Fig. S1** Nitrogen adsorption-desorption isotherms of (a)  $\text{TiO}_2$ , (b)  $\text{Mo}_2\text{C}@C/\text{TiO}_2$ , (c)  $\text{MoS}_2\text{-Mo}_2\text{C}@C/\text{TiO}_2$ , and (d)  $\text{MoS}_2@C/\text{TiO}_2$ .

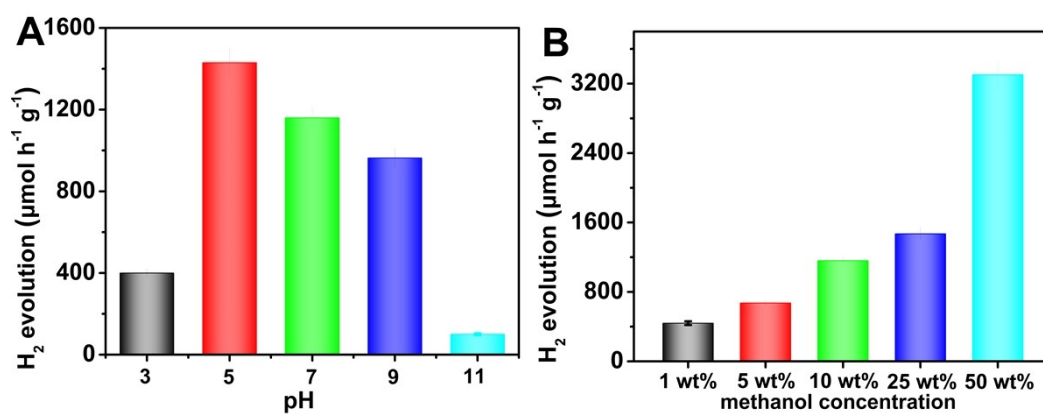

**Fig. S2** The photocatalytic H<sub>2</sub>-evolution performance of MoS<sub>2</sub>-Mo<sub>2</sub>C@C/TiO<sub>2</sub> photocatalyst under different pH value (A) and methanol concentration (B).

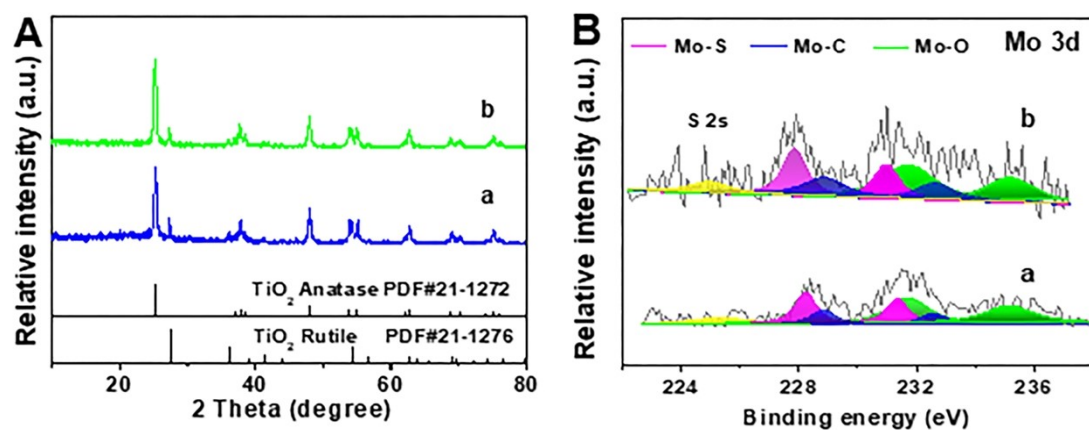

**Fig. S3** (A) XRD patterns and (B) XPS spectra of Mo 3d for the MoS<sub>2</sub>-Mo<sub>2</sub>C@C/TiO<sub>2</sub> sample: (a) before and (b) after the cyclic photocatalytic hydrogen-production reaction.

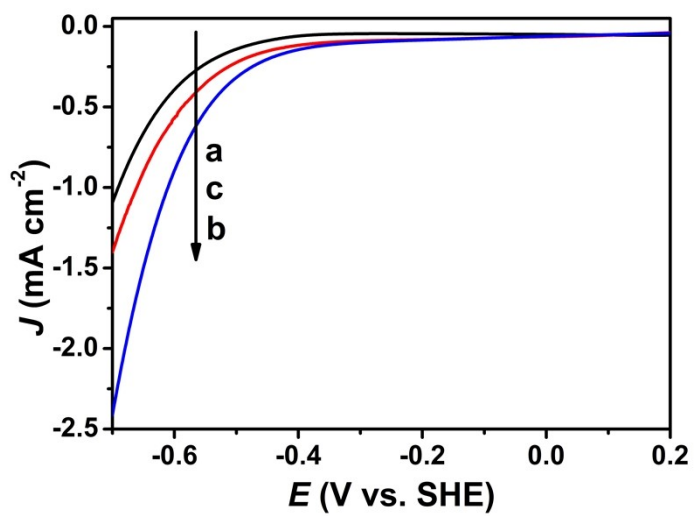

**Fig. S4** Linear sweep voltammetry curves of (a) Mo<sub>2</sub>C@C, (b) MoS<sub>2</sub>-Mo<sub>2</sub>C@C, and (c) MoS<sub>2</sub>@C.

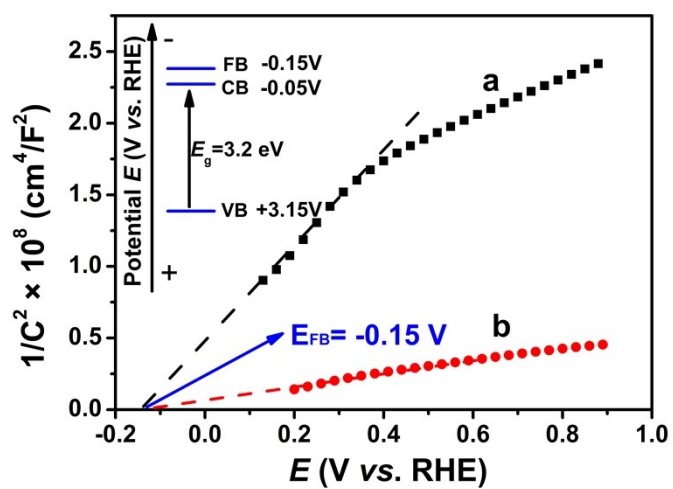

**Fig. S5** Mott-Schottky plots of (a)  $\text{TiO}_2$  and (b)  $\text{MoS}_2\text{-Mo}_2\text{C@/TiO}_2$  photocatalyst in  $\text{Na}_2\text{SO}_4$  solution ( $0.1 \text{ mol L}^{-1}$ ).

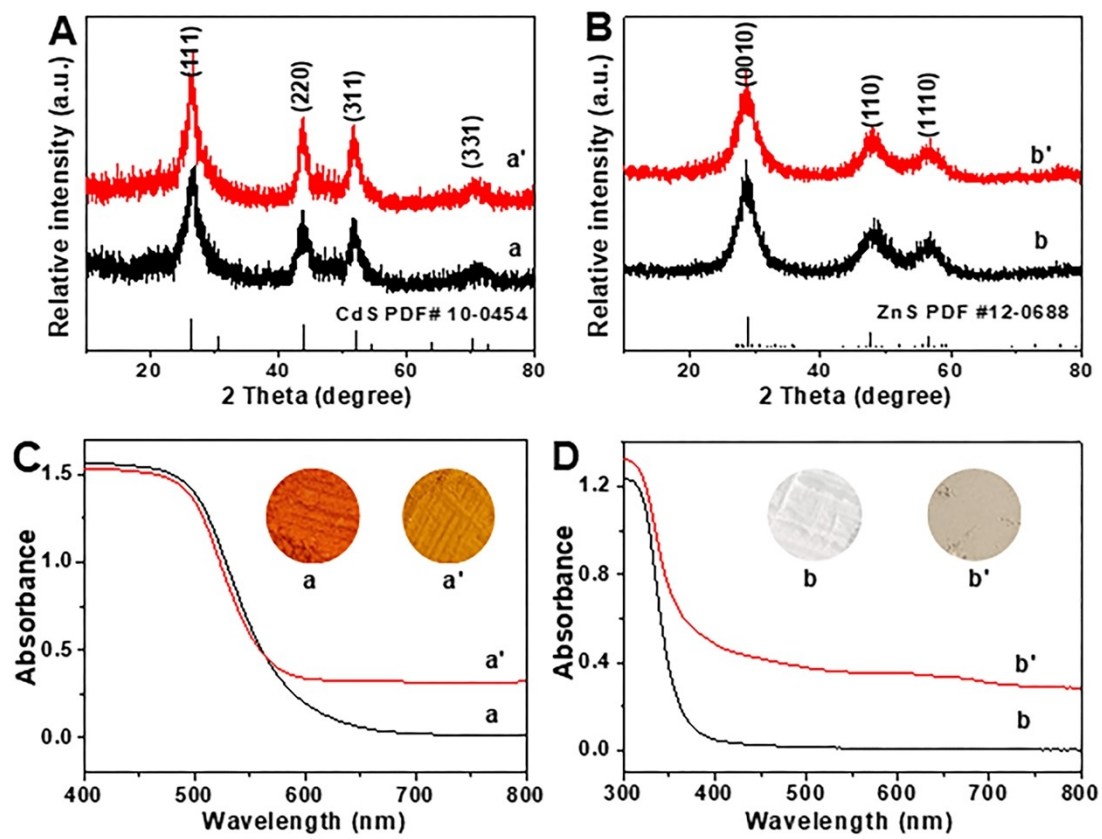

**Fig. S6** (A, B) XRD patterns and (C, D) UV-vis spectra of (a) CdS, (a') MoS<sub>2</sub>-Mo<sub>2</sub>C@C/CdS, (b) ZnS, and (b') MoS<sub>2</sub>-Mo<sub>2</sub>C@C/ZnS.
